# Supplementary material for: Genomic and proteomic analysis of lignin degrading and polyhydroxyalkanoate accumulating β-proteobacterium Pandoraea sp. ISTKB
Source: PubMed Central journal article supplement (PMC5987411; doi:10.1186/s13068-018-1148-2), 2018-06-05
Supplement: 13068_2018_1148_MOESM1_ESM.pdf [file 13068_2018_1148_MOESM1_ESM.pdf]

## **Additional file 1**

**Title: Genomic and proteomic analysis of lignin degrading and polyhydroxyalkanoate accumulating  $\beta$ -proteobacterium *Pandoraea* sp. ISTKB**

### **Author names and affiliations:**

Madan Kumar<sup>a</sup>, Sandhya Verma<sup>b</sup>, Rajesh Kumar Gazara<sup>b</sup>, Manish Kumar<sup>a</sup>, Ashok Pandey<sup>c</sup>, Praveen Kumar Verma<sup>b\*</sup> and Indu Shekhar Thakur<sup>a\*</sup>

<sup>a</sup>*School of Environmental Sciences, Jawaharlal Nehru University, New Delhi- 110067, India*

<sup>b</sup>*National Institute of Plant Genome Research, Aruna Asaf Ali Marg, New Delhi-110067, India*

<sup>c</sup>*CSIR-Indian Institute of Toxicology Research, 31 MG Marg, Lucknow-226 001, India*

\*Corresponding Author

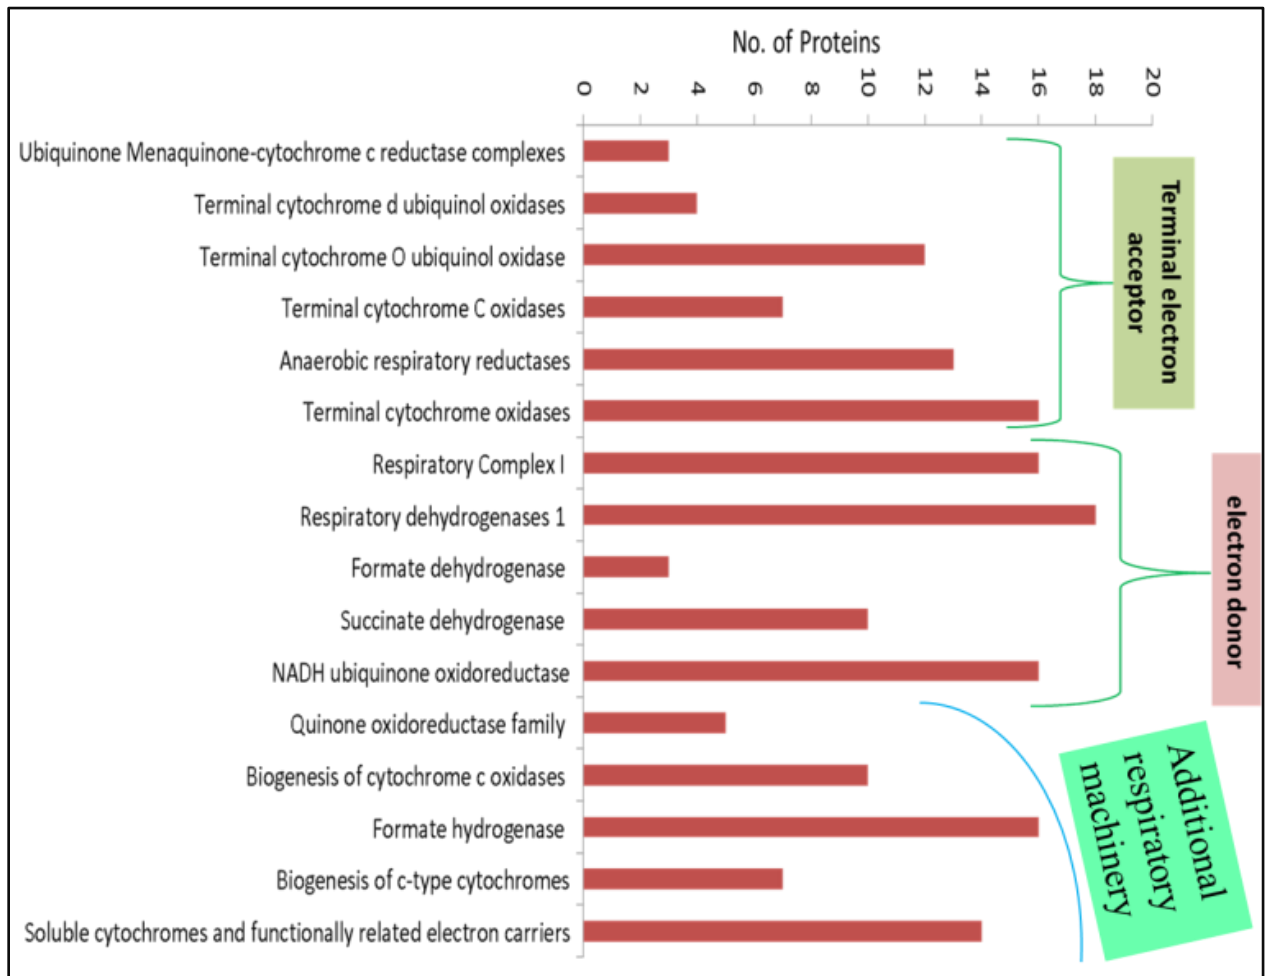

**Fig. S1.** Representation of various proteins responsible for respiratory machinery of *Pandoraeasp.* ISTKB.

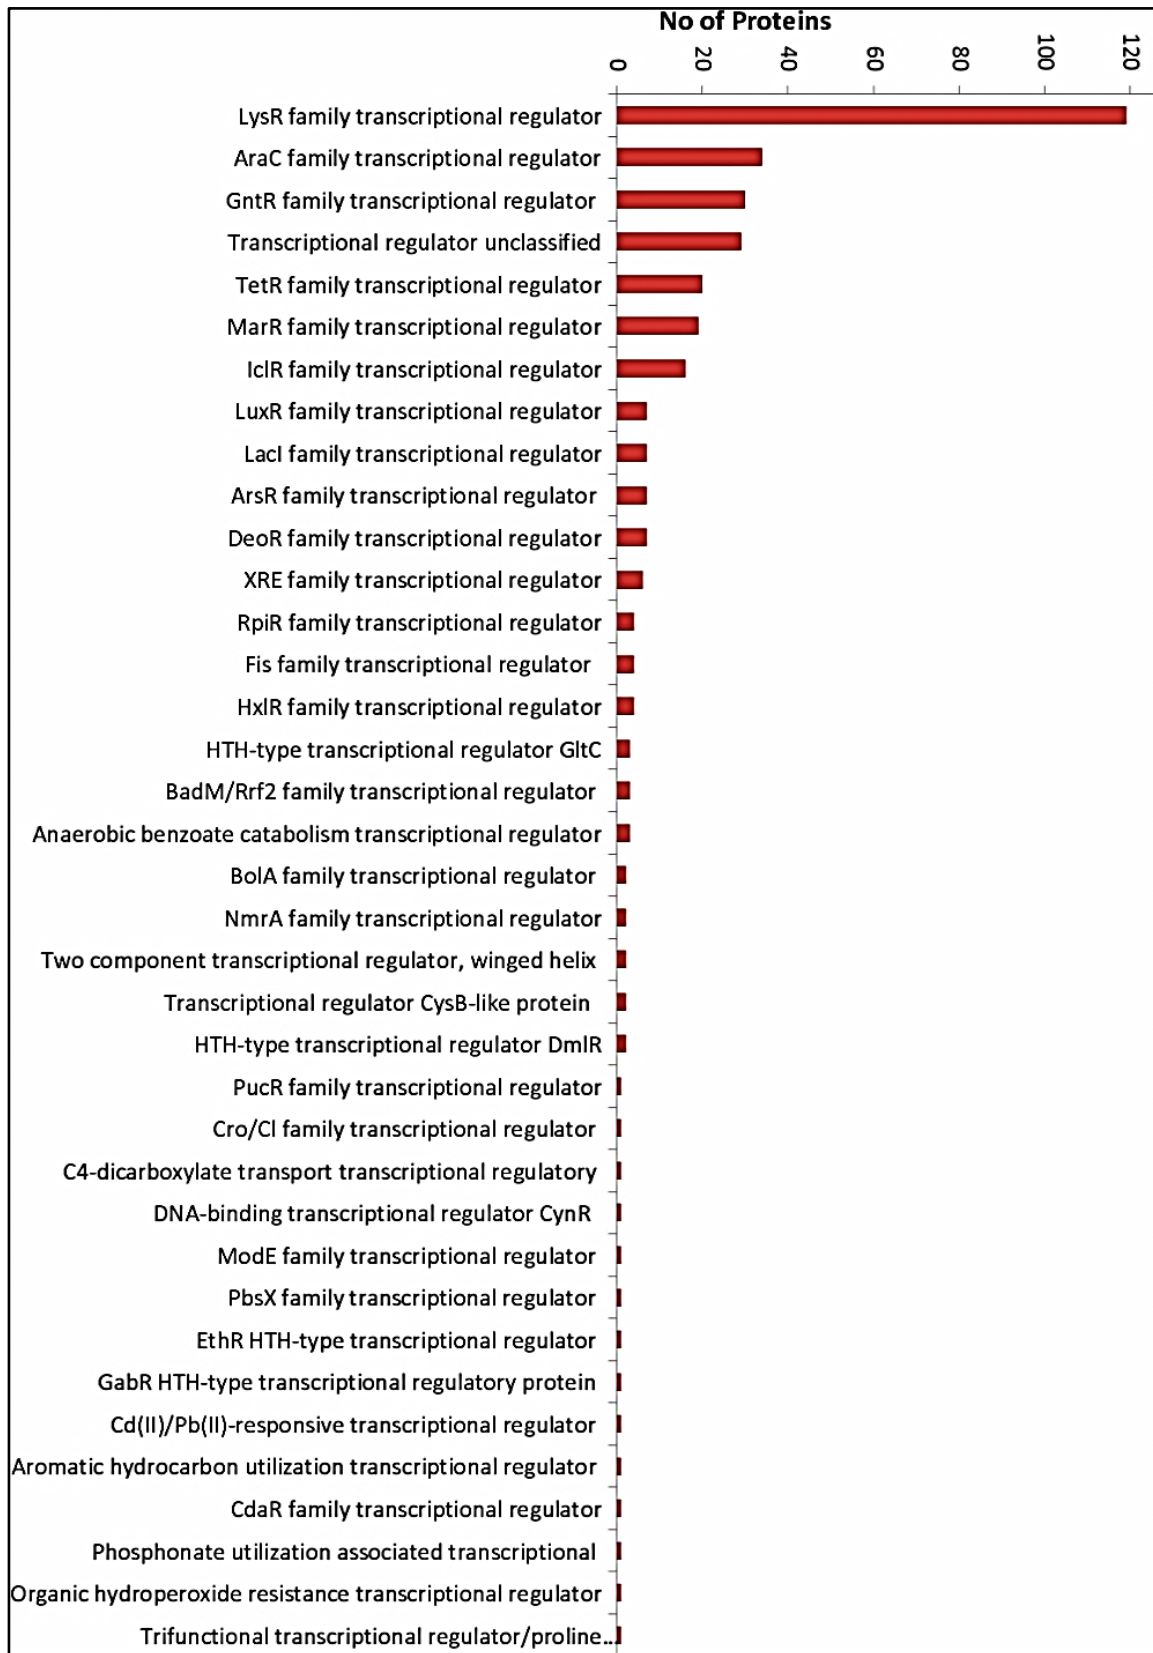

**Fig. S2.** Transcriptional regulators identified in the genome of *Pandoraea* sp. ISTKB.

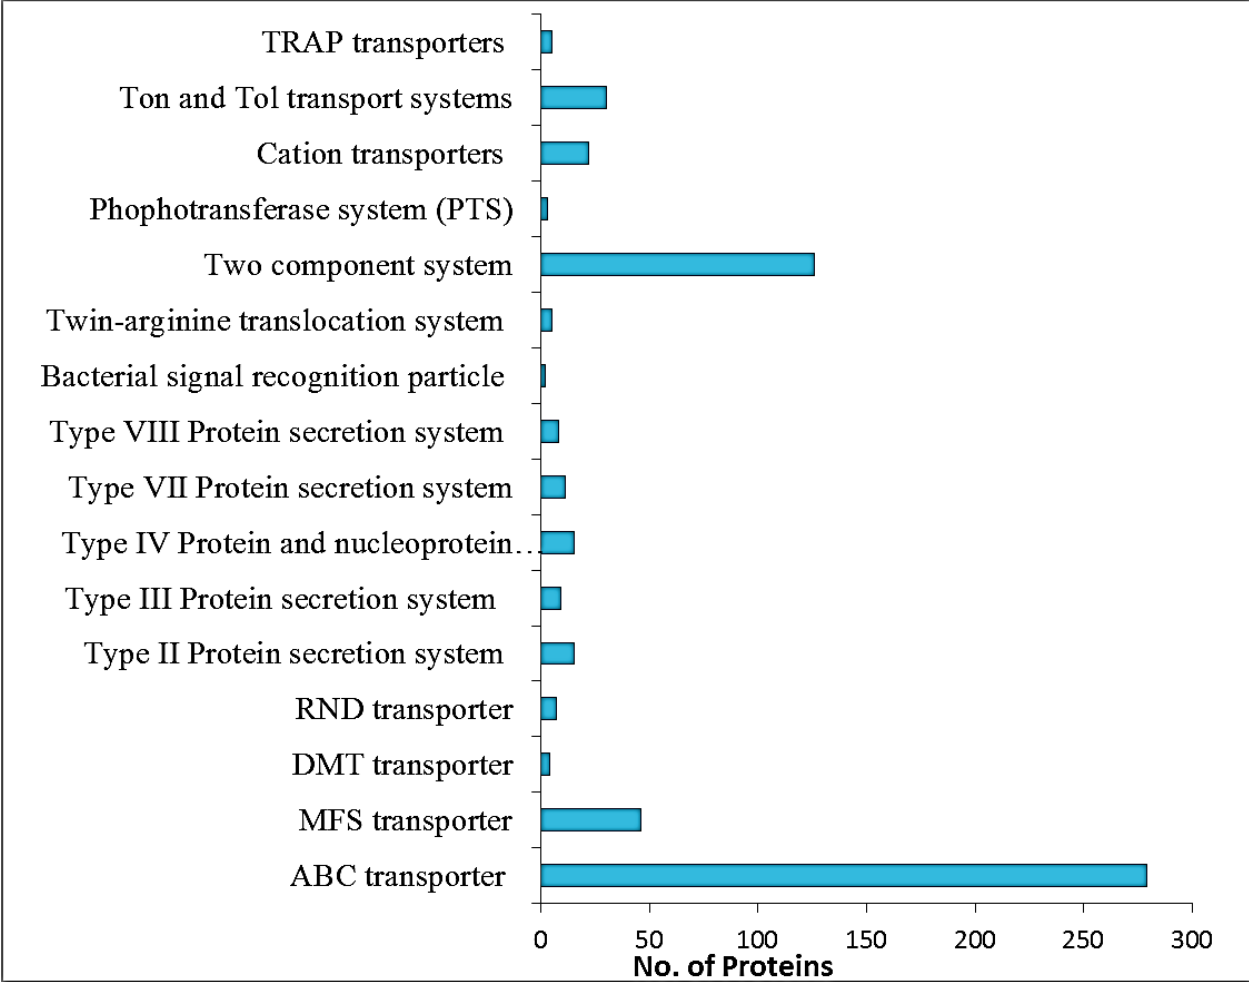

**Fig. S3.** Representation of various transporters present in the genome of *Pandoraea* sp. ISTKB.

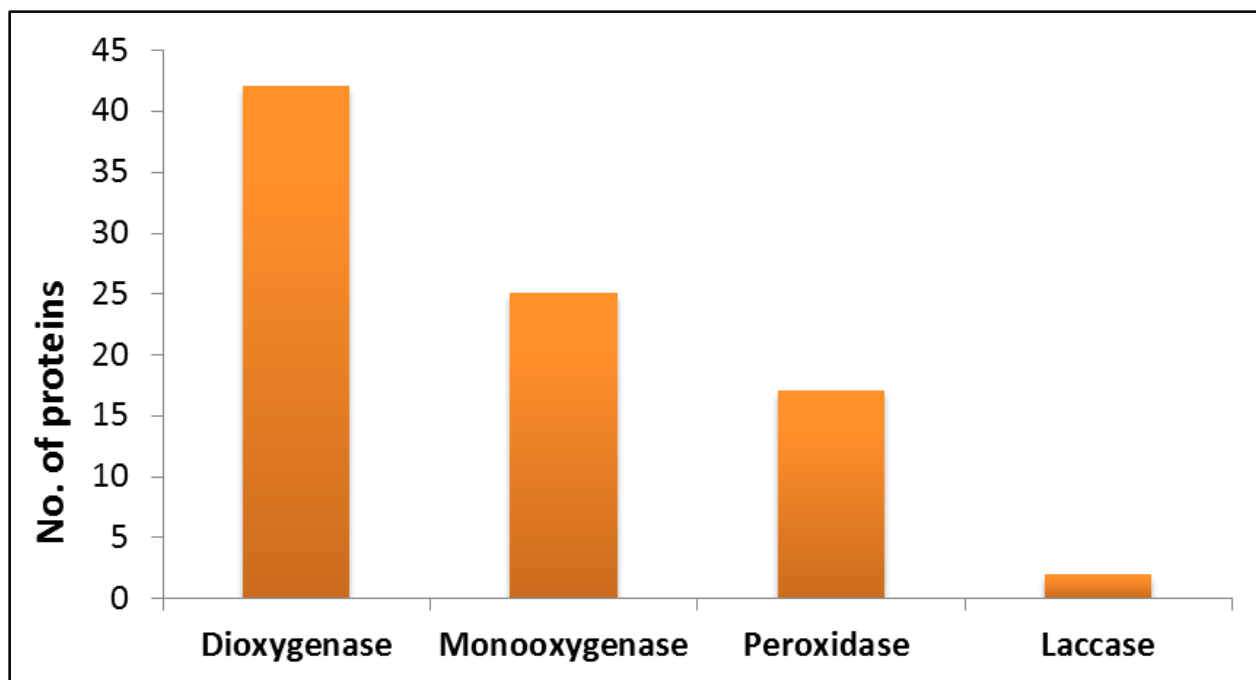

**Fig. S4.** Representation of major oxidoreductases responsible for lignin and aromatic compound degradation.

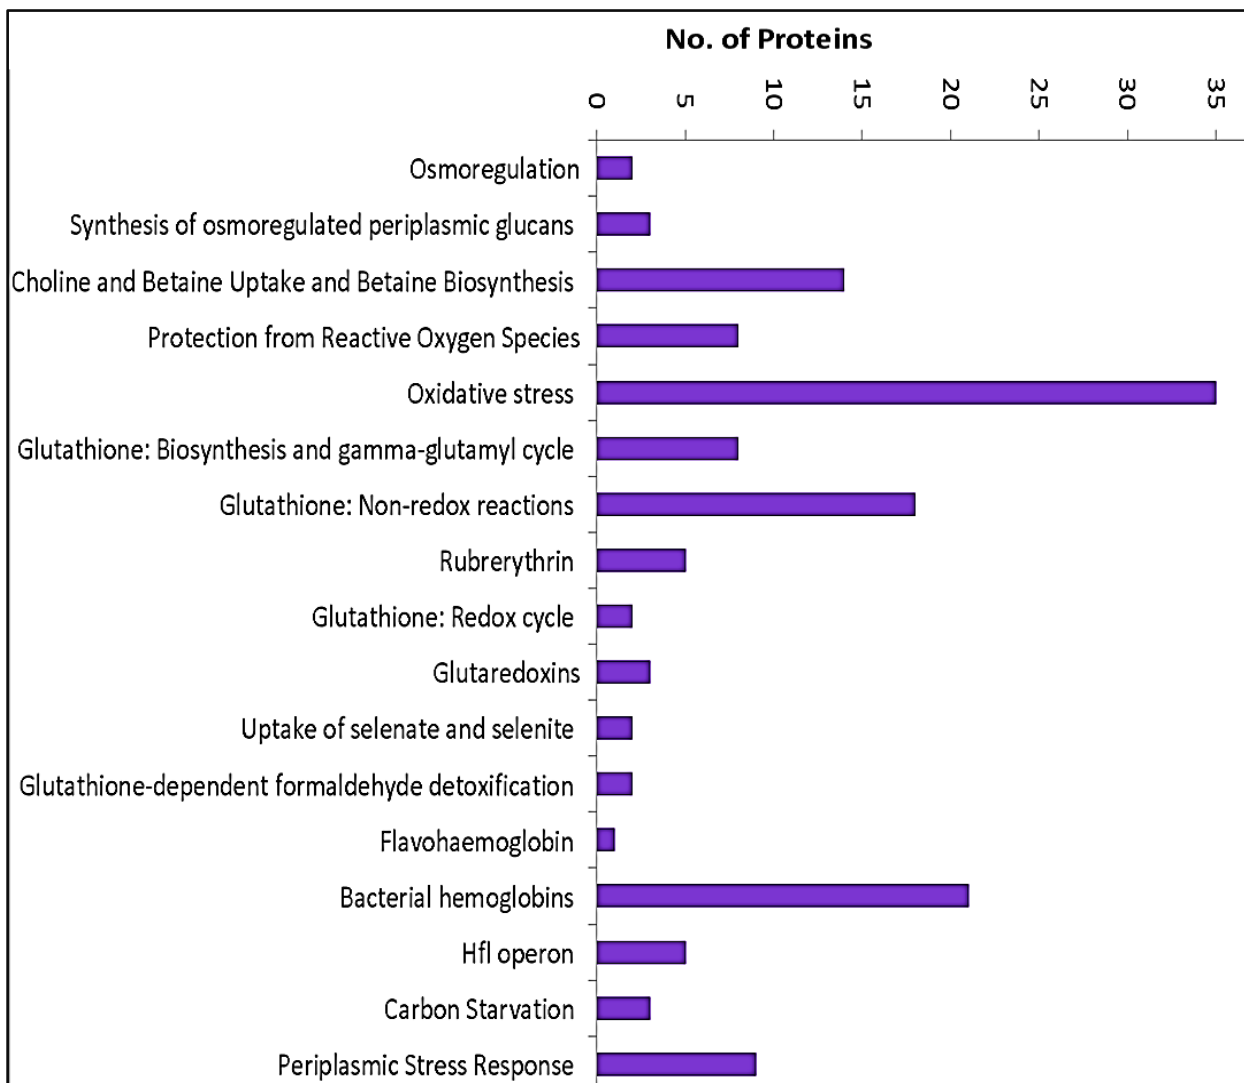

**Fig. S5.** Representation of proteins into various groups involved in stress regulation mechanism.

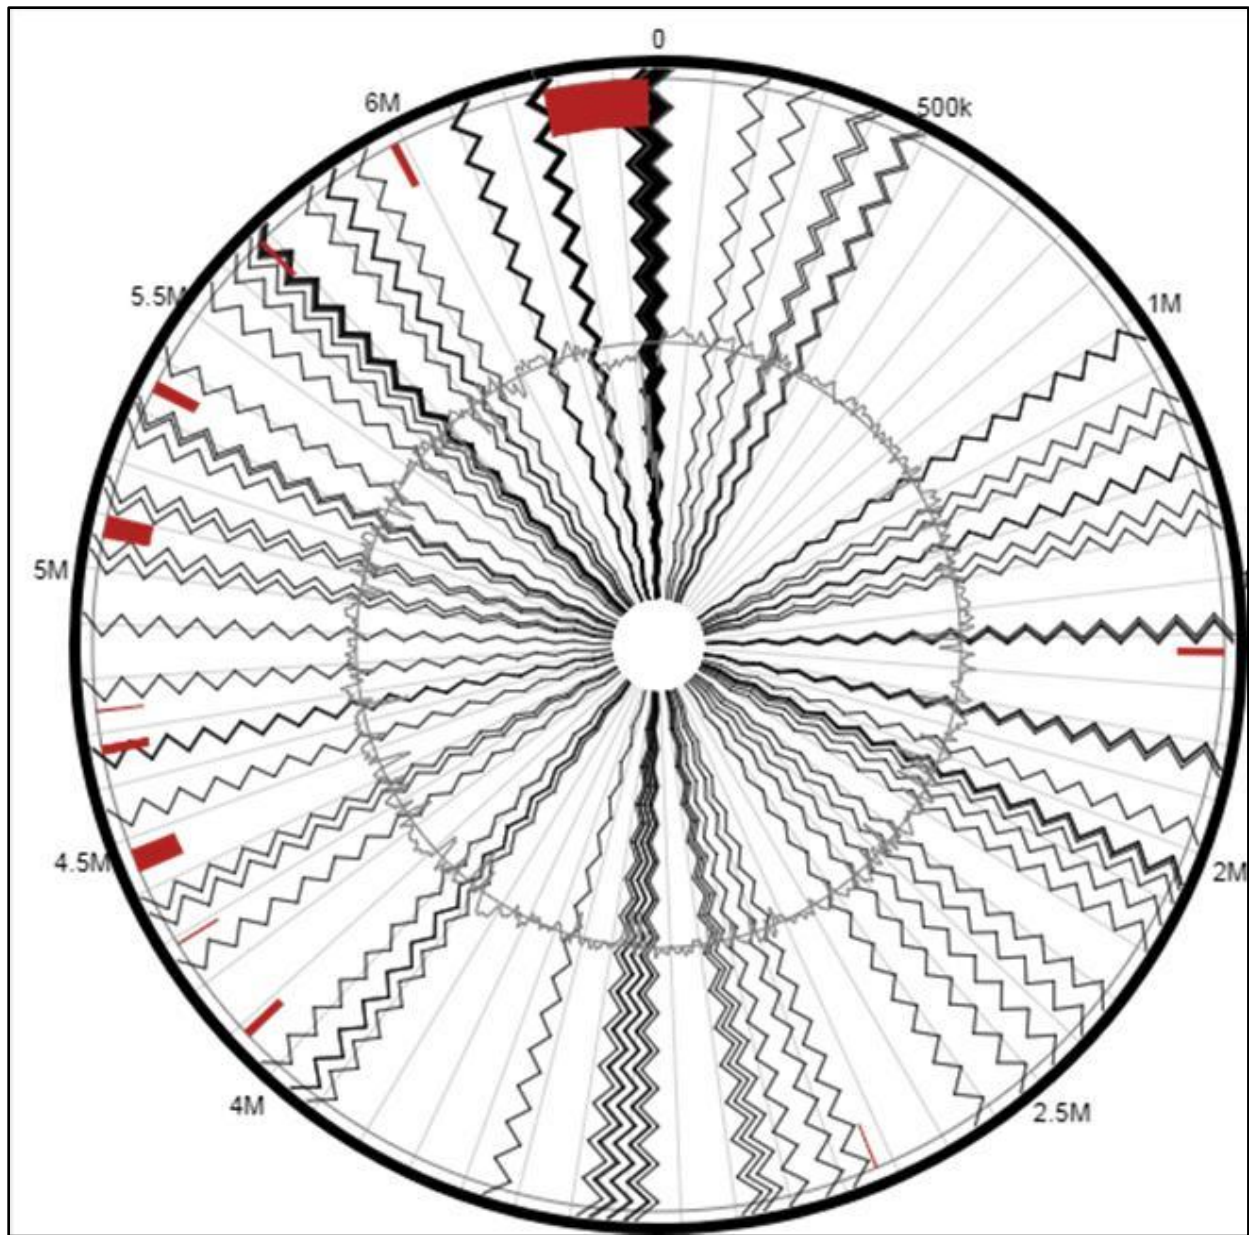

**Fig. S6.** Representation of genomic islands predicted by Islandviewer 4 in the *Pandoraea* sp. ISTKB genome.

**Table S1** KEGG Pathway classification of *Pandoraea* sp. ISTKB.

| <b>KEGG Pathway</b>                         | <b>Number of Proteins</b> |
|---------------------------------------------|---------------------------|
| <b>Metabolism</b>                           |                           |
| Overview                                    | 286                       |
| Carbohydrate metabolism                     | 259                       |
| Energy metabolism                           | 179                       |
| Lipid metabolism                            | 88                        |
| Nucleotide metabolism                       | 106                       |
| Amino acid metabolism                       | 318                       |
| Metabolism of other amino acids             | 88                        |
| Glycan biosynthesis and metabolism          | 45                        |
| Metabolism of cofactors and vitamins        | 197                       |
| Metabolism of terpenoids and polyketides    | 44                        |
| Biosynthesis of other secondary metabolites | 41                        |
| Xenobiotics biodegradation and metabolism   | 116                       |
| <b>Genetic Information Processing</b>       |                           |
| Transcription                               | 4                         |
| Translation                                 | 85                        |
| Folding, sorting and degradation            | 42                        |
| Replication and repair                      | 50                        |
| <b>Environmental Information Processing</b> |                           |
| Membrane transport                          | 226                       |
| Signal transduction                         | 146                       |
| <b>Cellular Processes</b>                   |                           |
| Transport and catabolism                    | 15                        |
| Cell growth and death                       | 22                        |
| Cellular community - prokaryotes            | 173                       |
| Cell motility                               | 60                        |



**Table S2.** Annotation of Monooxygenase genes identified in the genome of *Pandoraea* sp. ISTKB

| Pando_Id<br>(query)Locus<br>tag | Pando_Id<br>(query)Locus<br>tag | Description                                                      | % Identity | Alignment length | E-value   | Query cover |
|---------------------------------|---------------------------------|------------------------------------------------------------------|------------|------------------|-----------|-------------|
| A9762_26360                     | AHB77617.1                      | FAD-containing monooxygenase EthA [Pandoraea pnomenusu]          | 83.168     | 505              | 0         | 95          |
| A9762_15430                     | ODS71808.1                      | monooxygenase [Bordetella sp. SCN 67-23]                         | 62.532     | 387              | 2.28E-161 | 94          |
| A9762_05700                     | SAL83236.1                      | monooxygenase [Burkholderia arvi]                                | 82.522     | 452              | 0         | 99          |
| A9762_00610                     | SAK77773.1                      | monooxygenase [Burkholderia pterochthonis]                       | 72.018     | 436              | 0         | 98          |
| A9762_00860                     | CFB62521.1                      | Nitrioltriacetate monooxygenase component A [Pandoraea apista]   | 94.678     | 451              | 0         | 94          |
| A9762_00640                     | EWS66112.1                      | Nitronate monooxygenase [Hydrogenophaga sp. T4]                  | 64.537     | 313              | 2.2E-134  | 99          |
| A9762_13280                     | EON12850.1                      | phenylalanine 4-monooxygenase [Pandoraea sp. SD6-2]              | 93.95      | 281              | 0         | 99          |
| A9762_17475                     | SAL13664.1                      | 4-hydroxybenzoate 3-monooxygenase [Paraburkholderia telluris]    | 67.263     | 391              | 0         | 99          |
| A9762_05250                     | AOL06528.1                      | 6-hydroxynicotinate 3-monooxygenase [Burkholderia lata]          | 84.555     | 382              | 0         | 98          |
| A9762_09625                     | SAK76029.1                      | alkanesulfonate monooxygenase [Burkholderia arationis]           | 73.368     | 383              | 0         | 99          |
| A9762_22815                     | OED18971.1                      | alkanesulfonate monooxygenase [Burkholderia sp. A2]              | 82.808     | 349              | 0         | 95          |
| A9762_08385                     | SCB16369.1                      | anthraniloyl-CoA monooxygenase [Cupriavidus alkaliphilus]        | 79.821     | 783              | 0         | 99          |
| A9762_04935                     | ODV40636.1                      | antibiotic biosynthesis monooxygenase [Cupriavidus sp. UYMMa02A] | 64.583     | 96               | 5.31E-42  | 96          |
| A9762_26815                     | OAK66449.1                      | antibiotic biosynthesis monooxygenase [Variovorax paradoxus]     | 71.154     | 104              | 2.12E-50  | 94          |
| A9762_15430                     | EOM77545.1                      | aromaticringmonooxygenase[RhodococcusrhodniiLMG5362]             | 56.576     | 403              | 9.97E-140 | 97          |
| A9762_20610                     | KYF55981.1                      | FAD-bindingmonooxygenase[Sorangiumcellulosum]                    | 41.823     | 373              | 2.25E-92  | 93          |
| A9762_08590                     | KYF90066.1                      | FAD-bindingmonooxygenase[Sorangiumcellulosum]                    | 49.102     | 501              | 9.3E-145  | 98          |
| A9762_11070                     | EHP37661.1                      | FAD-dependentmonooxygenase[CupriavidusbasilensisOR16]            | 42.13      | 432              | 3.45E-90  | 96          |
| A9762_21985                     | SAL54713.1                      | flavin-containingmonooxygenaseFMO[Burkholderiaarvi]              | 81.604     | 424              | 0         | 99          |
| A9762_00395                     | CUJ47974.1                      | Flavin-dependentmonooxygenase[Achromobactersp.2789STDY5608625]   | 83.03      | 165              | 6.29E-98  | 99          |
| A9762_05695                     | ADD78448.1                      | 4-hydroxyphenylacetate3-monooxygenase,[PantoeaanatisPA13]        | 52.532     | 158              | 3.72E-55  | 92          |
| A9762_16310                     | SAL10828.1                      | luciferase-likemonooxygenase[Paraburkholderiahumi]               | 75.224     | 335              | 0         | 95          |
| A9762_23090                     | AEI80663.1                      | nitronatemonooxygenase[CupriavidusnecatorN-1]                    | 66.116     | 363              | 7.5E-151  | 97          |
| A9762_23095                     | AEI80663.1                      | nitronatemonooxygenase[CupriavidusnecatorN-1]                    | 70.137     | 365              | 5.33E-165 | 97          |
| A9762_10935                     | AAZ62959.1                      | Salicylate 1-monooxygenase[RalstoniaeutrophaJMP134]              | 70.278     | 360              | 6.2E-180  | 93          |

**Table S3.** Annotation of Dioxygenase genes identified in the genome of *Pandoraesp.* ISTKB

| Pando_Id (query) | Locus tag | NR_Db_Id (Subject) | Description                                                                       | % Identity | alignment length | E- value  | Query cover |
|------------------|-----------|--------------------|-----------------------------------------------------------------------------------|------------|------------------|-----------|-------------|
| A9762_05750      |           | ODS74090.1         | 2,4-dichlorophenoxyacetate dioxygenase [Bordetella sp. SCN 67-23]                 | 64.789     | 284              | 1.78E-128 | 93          |
| A9762_05265      |           | SAL59031.1         | 2,5-dihydroxypyridine 5,6-dioxygenase [Burkholderiaarvi]                          | 86.589     | 343              | 0         | 99          |
| A9762_20395      |           | SCB09348.1         | 2,5-dihydroxypyridine 5,6-dioxygenase [Cupriavidusalkaliphilus]                   | 70.37      | 351              | 6.83E-169 | 98          |
| A9762_23090      |           | EON11665.1         | 2-nitropropane dioxygenase [Pandoraea sp. SD6-2]                                  | 91.329     | 346              | 0         | 93          |
| A9762_00970      |           | ODV41070.1         | 4-hydroxyphenylpyruvate dioxygenase [Cupriavidus sp. UYMMa02A]                    | 91.317     | 357              | 0         | 99          |
| A9762_07755      |           | AFT86541.1         | benzoyl-CoA 2,3-dioxygenase component A [Paraburkholderiaphenoliruptrix BR3459a]  | 75.708     | 424              | 0         | 99          |
| A9762_22825      |           | AJP59870.1         | cysteine dioxygenase [Pandoraevavacti]                                            | 95.61      | 205              | 5.23E-143 | 99          |
| A9762_27320      |           | AJP58034.1         | dioxygenase [Pandoraevavacti]                                                     | 98.12      | 266              | 0         | 99          |
| A9762_27700      |           | AJP58034.1         | dioxygenase [Pandoraevavacti]                                                     | 98.12      | 266              | 0         | 99          |
| A9762_24855      |           | ODS79332.1         | extradiol ring-cleavage dioxygenase [Acidovorax sp. SCN 65-28]                    | 72.222     | 288              | 2.28E-159 | 99          |
| A9762_01340      |           | SCB18330.1         | gentisate 1,2-dioxygenase [Cupriavidusalkaliphilus]                               | 84.77      | 348              | 0         | 99          |
| A9762_15850      |           | SAK61630.1         | glyoxalase/bleomycin resistance protein/dioxygenase [Burkholderiaptereochothonis] | 86.232     | 138              | 2.77E-86  | 99          |
| A9762_01405      |           | EUC18785.1         | Glyoxalase/bleomycin resistance protein/dioxygenase [Burkholderia sp. BT03]       | 74.126     | 286              | 1.76E-159 | 99          |
| A9762_12845      |           | SAL18551.1         | glyoxalase/bleomycin resistance protein/dioxygenase [Paraburkholderiaterrestris]  | 72.263     | 137              | 3.3E-69   | 97          |
| A9762_21815      |           | SAL80458.1         | homogentisate 1,2-dioxygenase [Paraburkholderiatelluris]                          | 82.944     | 428              | 0         | 97          |
| A9762_05645      |           | BAM71411.1         | hydroxyquinol 1,2-dioxygenase [Ralstoniapickettii]                                | 72.263     | 274              | 4.7E-144  | 94          |
| A9762_16335      |           | ODV41789.1         | naphthalene 1,2-dioxygenase [Cupriavidus sp. UYMMa02A]                            | 70.192     | 104              | 4.96E-53  | 99          |
| A9762_16350      |           | ODV10699.1         | naphthalene 1,2-dioxygenase [Rubrivivax sp. SCN 70-15]                            | 57.102     | 352              | 6.83E-139 | 99          |
| A9762_07980      |           | SCB33007.1         | nitric oxide dioxygenase [Cupriavidusalkaliphilus]                                | 60.345     | 406              | 5.04E-156 | 99          |
| A9762_11040      |           | ODS75686.1         | phthalate 4,5-dioxygenase [Bordetella sp. SCN 67-23]                              | 64.096     | 415              | 0         | 93          |
| A9762_21285      |           | ODS69252.1         | protocatechuate 3,4-dioxygenase [Bordetella sp. SCN 67-23]                        | 71.429     | 119              | 5.36E-57  | 99          |
| A9762_17445      |           | OED18908.1         | protocatechuate 3,4-dioxygenase subunit beta [Burkholderia sp. A2]                | 74.569     | 232              | 2.71E-126 | 98          |
| A9762_21280      |           | EGD14970.1         | protocatechuate 4,5-dioxygenase beta subunit [Xanthomonasperforans 91-118]        | 82.394     | 284              | 4.95E-175 | 99          |
| A9762_21975      |           | SAL54674.1         | putative dioxygenase [Burkholderiaarvi]                                           | 85.106     | 376              | 0         | 98          |
| A9762_22350      |           | KPD18713.1         | quercetin 2,3-dioxygenase [Burkholderia sp. ST111]                                | 76.987     | 239              | 2.72E-134 | 99          |

| Pando_Id (query) | Locus tag | NR_Db_Id (Subject) | Description                                                                          | % Identity | alignment length | E- value  | Query cover |
|------------------|-----------|--------------------|--------------------------------------------------------------------------------------|------------|------------------|-----------|-------------|
| A9762_00640      |           | ETF03411.1         | 2-nitropropanedioxygenase[AdvenellakashmirensisW13003]                               | 63.141     | 312              | 3.29E-118 | 99          |
| A9762_23095      |           | SAL82943.1         | 2-nitropropanedioxygenase[Burkholderiaarvi]                                          | 64.305     | 367              | 2.58E-145 | 97          |
| A9762_27235      |           | KWW35604.1         | Alpha-ketoglutarate-dependentdioxxygenaseAlkB[Cupriavidusmetallidurans]              | 60.36      | 222              | 5.4E-82   | 99          |
| A9762_01405      |           | SAK81886.1         | biphenyl2,3-dioxygenase[Burkholderiacatudaia]                                        | 66.899     | 287              | 3.17E-139 | 99          |
| A9762_19835      |           | SCB27202.1         | catechol1,2-dioxygenase[Cupriavidusalkaliphilus]                                     | 69.258     | 283              | 4.86E-139 | 97          |
| A9762_24855      |           | KUJ67147.1         | catechol1,2-dioxygenase[Streptomycesalbussubsp.albus]                                | 41.958     | 286              | 3.29E-62  | 99          |
| A9762_19185      |           | GAQ27037.1         | catechol2,3-dioxygenase[Ralstoniasp.NT80]                                            | 78.652     | 178              | 1.81E-102 | 96          |
| A9762_19755      |           | SAL51551.1         | Chlorohydroquinone/hydroquinone1,2-dioxygenase[Burkholderiaturbans]                  | 43.533     | 317              | 1.35E-84  | 99          |
| A9762_17315      |           | EPX94702.1         | dioxygenase[Ralstoniasp.AU12-08]                                                     | 84.585     | 253              | 8.69E-160 | 91          |
| A9762_17955      |           | ODV19431.1         | dioxygenase[Rhodanobactersp.SCN68-63]                                                | 53.03      | 264              | 8.51E-91  | 96          |
| A9762_14645      |           | SAK54841.1         | glyoxalase/bleomycinresistanceprotein/dioxygenase[Burkholderiaglebae]                | 73.188     | 138              | 4.31E-72  | 99          |
| A9762_19155      |           | EKF18187.1         | Glyoxalase/bleomycinresistanceprotein/dioxygenase[Nitratireductorpacificuspht-3B]    | 51.128     | 133              | 8.5E-38   | 85          |
| A9762_12845      |           | SAL69811.1         | glyoxalase/bleomycinresistanceprotein/dioxygenase[Paraburkholderiatelluris]          | 69.343     | 137              | 5.46E-67  | 97          |
| A9762_11010      |           | SCK52185.1         | Phenylpropionatedioxygenase,largeterminalsunit[Variovoraxsp.HW608]                   | 73.193     | 332              | 0         | 96          |
| A9762_25450      |           | CCA87771.1         | putativeglyoxalase/bleomycinresistanceprotein/dioxygenase(phnB)[RalstoniasyzygiiR24] | 58.904     | 146              | 3.01E-51  | 97          |
| A9762_19755      |           | AAK26513.1         | putativehydroquinonemetaclevagedioxygenase(plasmid)[Pseudomonasputida]               | 78.481     | 316              | 0         | 99          |

**Table S4.** Annotation of Peroxidase genes identified in the genome of *Pandoraea* sp. ISTKB

| Pando_Id<br>(query)Locus tag | NR_Db_Id<br>(Subject) | Description                                                                                         | % Identity | alignment<br>length | E- value  | Query<br>cover |
|------------------------------|-----------------------|-----------------------------------------------------------------------------------------------------|------------|---------------------|-----------|----------------|
| A9762_15595                  | KGY27344.1            | alkylhydroperoxidase [Achromobacterxylooxidans]                                                     | 89.308     | 159                 | 1.15E-102 | 99             |
| A9762_26215                  | SAK99084.1            | alkylhydroperoxidase [Burkholderiapedi]                                                             | 85.638     | 188                 | 1.33E-112 | 99             |
| A9762_04630                  | AMH44149.1            | alkylhydroperoxidase [Burkholderia sp. PAMC 26561]                                                  | 86.154     | 130                 | 4.32E-82  | 99             |
| A9762_16100                  | ODV41293.1            | alkylhydroperoxidase [Cupriavidus sp. UYMMa02A]                                                     | 77.835     | 194                 | 4.87E-111 | 98             |
| A9762_17195                  | SCB13161.1            | alkylhydroperoxidaseAhpD family core domain-containing protein [Cupriavidusalkaliphilus]            | 70.909     | 110                 | 1.67E-50  | 96             |
| A9762_19885                  | AJA66520.1            | chloroperoxidase [Bradyrhizobiumjaponicum]                                                          | 73.934     | 211                 | 3.59E-118 | 98             |
| A9762_26475                  | AHB74970.1            | glutathione peroxidase [Pandoraea pnomenusa]                                                        | 90.446     | 157                 | 1.7E-104  | 93             |
| A9762_00985                  | AJG23567.1            | Non-hemechloroperoxidase [Cupriavidusbasilensis]                                                    | 81.55      | 271                 | 2.31E-168 | 98             |
| A9762_20355                  | EPX97329.1            | peroxidase [Ralstonia sp. AU12-08]                                                                  | 87.736     | 212                 | 1.07E-136 | 99             |
| A9762_25345                  | EFF74736.1            | peroxidase-like protein [Achromobacterpiechaudii ATCC 43553]                                        | 65.031     | 163                 | 3.94E-66  | 91             |
| A9762_24250                  | ALL66474.1            | putative dye-decolorizing peroxidase (DyP), encapsulated subgroup [Paraburkholderiacaribensis MBA4] | 70.492     | 366                 | 0         | 96             |
| A9762_25350                  | SCB32374.1            | uncharacterized peroxidase-related enzyme [Cupriavidusalkaliphilus]                                 | 82.234     | 197                 | 8.13E-119 | 99             |
| A9762_16100                  | EIF34546.1            | putativeperoxidase-relatedenzyme[Burkholderiasp.Ch1-1]                                              | 77.72      | 193                 | 2.49E-110 | 99             |
| A9762_16100                  | SAL70254.1            | peroxidase-likeprotein[Paraburkholderiachoica]                                                      | 76.684     | 193                 | 1.17E-108 | 99             |
| A9762_12720                  | KPD15963.1            | thiolperoxidase[Burkholderiasp.ST111]                                                               | 74.545     | 165                 | 4.46E-84  | 99             |
| A9762_19740                  | AKN73102.1            | chloroperoxidase[Streptomycessp.PBH53]                                                              | 57.075     | 212                 | 2.87E-91  | 91             |
| A9762_04630                  | AFT89771.1            | AhpDfamilyalkylhydroperoxidase-likeprotein[ParaburkholderiaphenoliruptrixBR3459a]                   | 86.923     | 130                 | 1.74E-80  | 99             |

**Table S5.** Peripheral pathways for catabolism of aromatic compounds

| <b>Salicylate ester degradation</b>  |                           |                                                                                       |                   |                         |                |                    |  |
|--------------------------------------|---------------------------|---------------------------------------------------------------------------------------|-------------------|-------------------------|----------------|--------------------|--|
| <b>Pando_Id</b><br>(query)Locus tag  | <b>NR_Db_Id</b> (Subject) | <b>Description</b>                                                                    | <b>% Identity</b> | <b>Alignment length</b> | <b>E-value</b> | <b>Query cover</b> |  |
| A9762_00930                          | ODV40846.1                | FAD-dependent oxidoreductase [Cupriavidus sp. UYMMa02A] , salicylate hydroxylase      | 77.601            | 567                     | 0              | 98                 |  |
| A9762_05250                          | AOL06528.1                | 6-hydroxynicotinate 3-monooxygenase [Burkholderialata] , salicylate hydroxylase       | 84.555            | 382                     | 0              | 98                 |  |
| A9762_27205                          | WP_044453514.1            | monooxygenase [Pandoraea vervacti], salicylate hydroxylase                            | 88                | 504                     | 0              | 99                 |  |
| A9762_10935                          | ODS76726.1                | salicylate hydroxylase [Bordetella sp. SCN 67-23]                                     | 75.346            | 361                     | 0              | 94                 |  |
| <b>Toluene degradation</b>           |                           |                                                                                       |                   |                         |                |                    |  |
| A9762_20020                          | CUV47131.1                | toluenesulfonate zinc dependent alcohol dehydrogenase, [Ralstoniasolanacearum]        | 74.704            | 253                     | 2.15E-134      | 99                 |  |
| <b>Quinate degradation</b>           |                           |                                                                                       |                   |                         |                |                    |  |
| A9762_12745                          | EON15457.1                | 3-dehydroquinate dehydratase [Pandoraea sp. SD6-2]                                    | 95.27             | 148                     | 2.28E-99       | 99                 |  |
| <b>Benzoate degradation</b>          |                           |                                                                                       |                   |                         |                |                    |  |
| A9762_14900                          | SAL34481.1                | major facilitator transporter [Paraburkholderiasordidicola]                           | 81.551            | 477                     | 0              | 99                 |  |
| A9762_00885                          | EKD98002.1                | hypothetical protein ACD_23C00630G0002 [uncultured bacterium]                         | 78.36             | 439                     | 0              | 95                 |  |
| A9762_08025                          | EON13600.1                | major facilitator transporter [Pandoraea sp. SD6-2]                                   | 93.432            | 472                     | 0              | 99                 |  |
| A9762_02810                          | EON12244.1                | benzoate transporter [Pandoraea sp. SD6-2]                                            | 96.615            | 384                     | 0              | 96                 |  |
| A9762_21250                          | AHB76015.1                | benzoylformate decarboxylase [Pandoraea pnomenus]                                     | 89.114            | 542                     | 0              | 99                 |  |
| A9762_16340                          | AMP38069.1                | salicylate hydroxylase [Ralstoniasolanacearum]                                        | 64.375            | 160                     | 7.55E-77       | 99                 |  |
| A9762_16345                          | KHQ96185.1                | salicylate hydroxylase [Pandoraea pnomenus]                                           | 94.393            | 428                     | 0              | 99                 |  |
| <b>p-Hydroxybenzoate degradation</b> |                           |                                                                                       |                   |                         |                |                    |  |
| A9762_17475                          | SAL13664.1                | 4-hydroxybenzoate 3-monooxygenase [Paraburkholderiatelluris]                          | 67.263            | 391                     | 0              | 99                 |  |
| A9762_17480                          | AKQ44180.1                | 4-hydroxybenzoate transporter [Cupriavidus sp. ST-14]                                 | 68.224            | 428                     | 0              | 93                 |  |
| A9762_19875                          | SAK47250.1                | major facilitator transporter [Burkholderiaarationis], 4-hydroxybenzoate transporter  | 52.381            | 462                     | 5.64E-161      | 99                 |  |
| A9762_01360                          | SCB18308.1                | MFS transporter, AAHS family, 4-hydroxybenzoate transporter [Cupriavidusalkaliphilus] | 76.906            | 446                     | 0              | 99                 |  |
| A9762_01395                          | AJC15953.1                | 4- hydroxybenzoate transporter, hypothetical protein NA29_07520 [Pandoraea sputorum]  | 92.601            | 446                     | 0              | 99                 |  |
| A9762_05365                          | AHB77010.1                | MFS transporter [Pandoraea pnomenus], 4- hydroxybenzoate transporter                  | 90.95             | 442                     | 0              | 97                 |  |
| A9762_06695                          | AJC22813.1                | 4-hydroxybenzoate transporter [Pandoraea pulmonicola]                                 | 95.122            | 451                     | 0              | 99                 |  |

| <b>Pando_Id</b><br><b>(query)</b>         | <b>Locus tag</b> | <b>NR_Db_Id (Subject)</b> | <b>Description</b>                                                     | <b>% Identity</b> | <b>Alignment length</b> | <b>E-value</b> | <b>Query cover</b> |
|-------------------------------------------|------------------|---------------------------|------------------------------------------------------------------------|-------------------|-------------------------|----------------|--------------------|
| <b>Gentisate degradation</b>              |                  |                           |                                                                        |                   |                         |                |                    |
| A9762_01340                               | SCB18330.1       |                           | gentisate 1,2-dioxygenase [Cupriavidusalkaliphilus]                    | 84.77             | 348                     | 0              | 99                 |
| A9762_14650                               | CDO29336.1       |                           | 2-hydroxyhepta-2,4-diene-1,7-dioate isomerase [Mycobacterium vulneris] | 72.174            | 230                     | 3.71E-119      | 98                 |
| A9762_19175                               | CFB64090.1       |                           | Ureidoglycolatelyase [Pandoraea apista]                                | 89.274            | 317                     | 0              | 99                 |
| A9762_23215                               | EHP44713.1       |                           | fumarylacetoacetate (FAA) hydrolase [Cupriavidusbasilensis OR16]       | 63.137            | 255                     | 1.79E-117      | 99                 |
| A9762_27350                               | SAL20802.1       |                           | fumarylacetoacetate (FAA) hydrolase [Paraburkholderiatelluris]         | 82.927            | 328                     | 0              | 99                 |
| A9762_01350                               | ODV43763.1       |                           | maleylacetoacetateisomerase [Cupriavidus sp. UYMMa02A]                 | 74.648            | 213                     | 1.87E-117      | 99                 |
| A9762_03985                               | AKM33115.2       |                           | Glutathione S-transferase, zeta (EC 2.5.1.18)                          | 81.86             | 215                     | 7.24E-126      | 99                 |
| A9762_02055                               | AHB76272.1       |                           | maleylacetoacetateisomerase [Pandoraea pnomenusa]                      | 89.623            | 212                     | 7.34E-142      | 98                 |
| A9762_01355                               | SCB18315.1       |                           | 3-hydroxybenzoate 6-hydroxylase [Cupriavidusalkaliphilus]              | 83.733            | 375                     | 0              | 92                 |
| A9762_17480                               | AKQ44180.1       |                           | 4-hydroxybenzoate transporter [Cupriavidus sp. ST-14]                  | 68.224            | 428                     | 0              | 93                 |
| A9762_19875                               | SAK47250.1       |                           | 4- hydroxybenzoate transporter [Burkholderiaarationis]                 | 52.381            | 462                     | 5.64E-161      | 99                 |
| A9762_01360                               | SCB18308.1       |                           | 4-hydroxybenzoate transporter [Cupriavidusalkaliphilus]                | 76.906            | 446                     | 0              | 99                 |
| A9762_01395                               | AJC15953.1       |                           | 4-hydroxybenzoate transporter                                          | 92.601            | 446                     | 0              | 99                 |
| A9762_05365                               | AHB77010.1       |                           | MFS transporter [Pandoraea pnomenusa]                                  | 90.95             | 442                     | 0              | 97                 |
| A9762_06695                               | WP_044456298.1   |                           | MFS transporter [Pandoraea vervacti]                                   | 98                | 440                     | 0              | 100                |
| <b>Chloroaromatic degradation pathway</b> |                  |                           |                                                                        |                   |                         |                |                    |
| A9762_14800                               | AHB74276.1       |                           | 3-oxoadipate enol-lactone hydrolase [Pandoraea pnomenusa]              | 90.975            | 277                     | 0              | 95                 |
| A9762_17465                               | AJP59451.1       |                           | 3-oxoadipate enol-lactonase [Pandoraea vervacti]                       | 91.373            | 255                     | 1.08E-168      | 97                 |
| A9762_20400                               | AJC18736.1       |                           | hypothetical protein NA29_10045 [Pandoraea sputorum]                   | 86.296            | 270                     | 1.18E-155      | 94                 |
| A9762_21335                               | CFB62067.1       |                           | Putative aminoacrylate hydrolase RutD [Pandoraea apista]               | 85.833            | 240                     | 6.85E-132      | 97                 |
| A9762_22015                               | ALS60105.1       |                           | hypothetical protein AT302_10360 [Pandoraea norimbergensis]            | 83.267            | 251                     | 2.22E-142      | 95                 |
| A9762_00955                               | SCB31925.1       |                           | acetyl-CoA acyltransferase [Cupriavidusalkaliphilus]                   | 85.75             | 400                     | 0              | 99                 |
| A9762_23730                               | SCB31925.1       |                           | acetyl-CoA acyltransferase [Cupriavidusalkaliphilus]                   | 86                | 400                     | 0              | 99                 |
| A9762_00950                               | SCB31929.1       |                           | 3-oxoadipate CoA-transferase beta subunit [Cupriavidusalkaliphilus]    | 84.211            | 209                     | 2.42E-128      | 97                 |
| A9762_00945                               | SAL68494.1       |                           | 3-oxoacid CoA-transferase subunit A [Paraburkholderiatelluris]         | 88.288            | 222                     | 1.13E-140      | 98                 |

Contd

.....

| Pando_Id<br>(query)Locus tag        | NR_Db_Id (Subject) | Description                                                                                                | % Identity | Alignment<br>length | E-value   | Query<br>cover |
|-------------------------------------|--------------------|------------------------------------------------------------------------------------------------------------|------------|---------------------|-----------|----------------|
| <b>Aromatic Amin Catabolism</b>     |                    |                                                                                                            |            |                     |           |                |
| A9762_24855                         | ODS79332.1         | 3,4-dihydroxyphenylacetate 2,3-dioxygenase (EC 1.13.11.15)                                                 | 72.222     | 288                 | 2.28E-159 | 99             |
| A9762_23735                         | WP_044457180.1     | phenylacetic acid degradation protein PaaN [Pandoraea vervacti]                                            | 98         | 551                 | 0         | 100            |
| A9762_14815                         | AJP59439.1         | flavinreductase/ nitrilotriacetatemonooxygenase [Pandoraea vervacti]                                       | 94.603     | 315                 | 0         | 99             |
| A9762_03435                         | SAL10420.1         | Nitrilotriacetatemonooxygenase component B (EC 1.14.13.-)                                                  | 80.976     | 205                 | 2.7E-119  | 98             |
| A9762_20390                         | AJC19509.1         | flavinreductase [Pandoraea pulmonicola]                                                                    | 93.605     | 172                 | 5.42E-118 | 96             |
| A9762_05695                         | SAL83234.1         | 4-hydroxyphenylacetate 3-monooxygenase, reductase component (EC 1.6.8.-)                                   | 68.421     | 152                 | 6.97E-72  | 88             |
| A9762_05815                         | AMH43479.1         | flavinreductase domain-containing protein [Burkholderia sp. PAMC 26561]                                    | 81.026     | 195                 | 4.32E-114 | 92             |
| A9762_00395                         | ERH61157.1         | flavinreductase [Pseudomonas fluorescens EGD-AQ6]                                                          | 84.337     | 166                 | 4.13E-98  | 99             |
| <b>Lignin degradation fragments</b> |                    |                                                                                                            |            |                     |           |                |
| A9762_21325                         | EON13924.1         | 4-carboxy-4-hydroxy-2-oxoadipate aldolase (EC 4.1.3.17)                                                    | 96.996     | 233                 | 9.44E-161 | 99             |
| A9762_21330                         | CDQ34089.1         | 4-oxalomesaconate tautomerase/ FldA protein [Virgibacilluslodenitrificans]                                 | 66.667     | 369                 | 2.24E-164 | 99             |
| A9762_21290                         | ALS59920.1         | LysR family transcriptional regulator associated with utilization of aromatics[Pandoraea norimbergensis]   | 94.395     | 446                 | 0         | 99             |
| A9762_21285                         | ODS69252.1         | Protocatechuate 4,5-dioxygenase alpha chain (EC 1.13.11.8)                                                 | 71.429     | 119                 | 5.36E-57  | 99             |
| A9762_21280                         | EGD14970.1         | protocatechuate 4,5-dioxygenase beta subunit [Xanthomonasperforans 91-118]                                 | 82.394     | 284                 | 4.95E-175 | 99             |
| <b>Vanillin degradation</b>         |                    |                                                                                                            |            |                     |           |                |
| A9762_11020                         | SCB20362.1         | ferredoxin--NADP+ reductase/vanillate O-demethylaseferredoxin subunit [Cupriavidusalkaliphilus]            | 59.248     | 319                 | 4.01E-128 | 99             |
| A9762_21255                         | EON13938.1         | Probable VANILLIN dehydrogenase oxidoreductase protein (EC 1.-.-.-)                                        | 93.047     | 489                 | 0         | 99             |
| A9762_21265                         | SCK14327.1         | vanillate O-demethylaseferredoxin subunit [Variovorax sp. HW608]                                           | 63.208     | 318                 | 7.8E-141  | 99             |
| A9762_21270                         | CUV18877.1         | vanillate O-demethylaseoxygenase subunit (4-hydroxy-3-methoxybenzoate demethylase) [Ralstoniasolanacearum] | 74.194     | 341                 | 0         | 96             |
| A9762_21275                         | AHB76020.1         | Transcriptional regulator for ferulate or vanillate catabolism                                             | 96.698     | 212                 | 8.71E-144 | 95             |
| <b>Ferulate degradation</b>         |                    |                                                                                                            |            |                     |           |                |
| A9762_19045                         | EON11379.1         | feruloyl-CoA synthase [Pandoraea sp. SD6-2]                                                                | 87.84      | 625                 | 0         | 99             |
| A9762_21275                         | AHB76020.1         | Transcriptional regulator for ferulate or vanillate catabolism                                             | 96.698     | 212                 | 8.71E-144 | 95             |

| <b>Pando_Id<br/>(query)Locus tag</b>    | <b>NR_Db_Id (Subject)</b> | <b>Description</b>                                                               | <b>% Identity</b> | <b>Alignment<br/>length</b> | <b>E-value</b> | <b>Query<br/>cover</b> |
|-----------------------------------------|---------------------------|----------------------------------------------------------------------------------|-------------------|-----------------------------|----------------|------------------------|
| <b>Aromatic amino acid degradation</b>  |                           |                                                                                  |                   |                             |                |                        |
| A9762_05715                             | KDR37901.1                | pyridoxal-dependent decarboxylase [Paraburkholderiaglathiei]                     | 75.771            | 454                         | 0              | 98                     |
| A9762_24850                             | ODS79333.1                | 5-carboxymethyl-2-hydroxymuconate semialdehyde dehydrogenase (EC 1.2.1.60)       | 76.375            | 491                         | 0              | 99                     |
| A9762_24855                             | ODS79332.1                | 3,4-dihydroxyphenylacetate 2,3-dioxygenase (EC 1.13.11.15)                       | 72.222            | 288                         | 2.28E-159      | 99                     |
| A9762_24840                             | ODS79336.1                | 2-oxo-hepta-3-ene-1,7-dioic acid hydratase [Acidovorax sp. SCN 65-28]            | 71.429            | 266                         | 1.65E-139      | 99                     |
| A9762_14090                             | ODT32327.1                | 2,4-dihydroxyhept-2-ene-1,7-dioic acid aldolase (EC 4.1.2.-)                     | 39.357            | 249                         | 3.06E-45       | 87                     |
| A9762_00725                             | SAL80058.1                | Aromatic amino acid transport protein AroP                                       | 76.744            | 473                         | 0              | 99                     |
| A9762_00975                             | SAK78922.1                | aromatic amino acid transport protein [Burkholderiaptereochothonis]              | 88.641            | 449                         | 0              | 97                     |
| A9762_04905                             | AJC18741.1                | Phenylalanine-specific permease                                                  | 71.336            | 464                         | 0              | 97                     |
| A9762_22710                             | AJC18741.1                | Phenylalanine-specific permease                                                  | 97.216            | 467                         | 0              | 99                     |
| A9762_20380                             | KHQ93930.1                | kynurenineformamidase [Pandoraea pnomenusu]                                      | 92.079            | 202                         | 2.78E-132      | 98                     |
| A9762_13280                             | EON12850.1                | phenylalanine 4-monooxygenase [Pandoraea sp. SD6-2]                              | 93.95             | 281                         | 0              | 99                     |
| A9762_00970                             | ODV41070.1                | 4-hydroxyphenylpyruvate dioxygenase [Cupriavidus sp. UYMMa02A]                   | 91.317            | 357                         | 0              | 99                     |
| A9762_20370                             | AJP59879.1                | tryptophan 2,3-dioxygenase [Pandoraea vervacti]                                  | 90.282            | 319                         | 0              | 97                     |
| A9762_26260                             | ODV14183.1                | 2-hydroxyhepta-2,4-diene-1,7-dioate isomerase [Rubrivivax sp. SCN 70-15]         | 69.338            | 287                         | 8.14E-141      | 99                     |
| A9762_13435                             | WP_039394138.1            | homoprotocatechuate degradation operon regulator, HpaR [Pandoraea]               | 98                | 161                         | 1.00E-112      | 100                    |
| A9762_01460                             | CAJ95344.1                | 2-Hydroxymuconic semialdehyde dehydrogenase [Ralstoniaeutropha H16]              | 85.744            | 484                         | 0              | 99                     |
| <b>Benzoyl-CoA mediated degradation</b> |                           |                                                                                  |                   |                             |                |                        |
| A9762_07750                             | KPD16106.1                | benzoyl-CoA oxygenase [Burkholderia sp. ST111]                                   | 92.421            | 475                         | 0              | 99                     |
| A9762_07755                             | AFT86541.1                | benzoyl-CoA 2,3-dioxygenase component A [Paraburkholderiaphenoliruptrix BR3459a] | 75.708            | 424                         | 0              | 99                     |
| A9762_12180                             | CRM37160.1                | anaerobic benzoate catabolism transcriptional regulator [Pseudomonas sp. 58 R 3] | 38.356            | 73                          | 8.07E-11       | 88                     |
| A9762_08410                             | KHQ95703.1                | 4-hydroxybenzoyl-CoA thioesterase [Pandoraea pnomenusu]                          | 97.183            | 142                         | 4.08E-98       | 90                     |
| A9762_19020                             | EON11384.1                | anaerobic benzoate catabolism transcriptional regulator [Pandoraea sp. SD6-2]    | 91.815            | 281                         | 0              | 99                     |
| A9762_23595                             | CRM37160.1                | anaerobic benzoate catabolism transcriptional regulator [Pseudomonas sp. 58 R 3] | 33.721            | 86                          | 2.23E-08       | 90                     |
| A9762_08410                             | KHQ95703.1                | 4-hydroxybenzoyl-CoA thioesterase [Pandoraea pnomenusu]                          | 97.183            | 142                         | 4.08E-98       | 90                     |

Contd....



| Pando_Id (query)Locus tag                                 | NR_Db_Id (Subject) | Description                                                                        | % Identity | Alignment length | E-value   | Query cover |
|-----------------------------------------------------------|--------------------|------------------------------------------------------------------------------------|------------|------------------|-----------|-------------|
| <b>Biphenyl or cinnamic acid degradation</b>              |                    |                                                                                    |            |                  |           |             |
| A9762_10790                                               | AJC19190.1         | 2-keto-4-pentenoate hydratase [Pandoraea sputorum]                                 | 97.77      | 269              | 0         | 95          |
| A9762_19185                                               | AHB78072.1         | 2,3-dihydroxybiphenyl 1,2-dioxygenase                                              | 92.973     | 185              | 3.29E-127 | 99          |
| A9762_04960                                               | ODS74842.1         | 4-hydroxy-2-oxovalerate aldolase [Bordetella sp. SCN 67-23]                        | 89.254     | 335              | 0         | 99          |
| A9762_25270                                               | AJP58375.1         | 2-hydroxy-6-oxo-6-phenylhexa-2,4-dienoate hydrolase (EC 3.7.1.-)                   | 86.88      | 343              | 0         | 97          |
| A9762_25765                                               | AHB77129.1         | 2-keto-4-pentenoate hydratase (EC 4.2.1.80)                                        | 80         | 220              | 2.77E-124 | 87          |
| <b>Phenol degradation</b>                                 |                    |                                                                                    |            |                  |           |             |
| A9762_15430                                               | ODS71808.1         | 2-polyprenyl-6-methoxyphenol hydroxylase and related FAD-dependent oxidoreductases | 62.532     | 387              | 2.28E-161 | 94          |
| A9762_20610                                               | BAK84768.1         | 2-polyprenyl-6-methoxyphenol hydroxylase and related FAD-dependent oxidoreductases | 57.538     | 398              | 4.94E-162 | 99          |
| A9762_03525                                               | WP_046291377.1     | Putative MetA-pathway of phenol degradation (pfam)                                 | 93         | 231              | 2.00E-169 | 100         |
| A9762_27630                                               | WP_047905605.1     | Putative MetA-pathway of phenol degradation (pfam)                                 | 90         | 218              | 1.00E-161 | 100         |
| <b>Phenylacetic acid degradation</b>                      |                    |                                                                                    |            |                  |           |             |
| A9762_14315                                               | SCB11103.1         | phenylacetate-CoA ligase [Cupriavidusalkaliphilus]                                 | 65.468     | 417              | 0         | 99          |
| A9762_23715                                               | SAK91506.1         | phenylacetate-CoA ligase [Burkholderiaarationis]                                   | 85.581     | 430              | 0         | 99          |
| A9762_23720                                               | EON10727.1         | phenylacetic acid degradation- related thioesterase (PaaI) [Pandoraea sp. SD6-2]   | 93.525     | 139              | 7.92E-94  | 99          |
| A9762_23865                                               | GAT99760.1         | phenylacetate-CoA oxygenase subunit PaaB [Burkholderiastabilis]                    | 86.022     | 93               | 1.01E-54  | 94          |
| A9762_23875                                               | CFB61605.1         | Putative 1,2-phenylacetyl-CoA epoxidase, subunit D [Pandoraea apista]              | 96.316     | 190              | 8.62E-132 | 98          |
| A9762_23880                                               | SAL63160.1         | phenylacetate-CoA oxygenase/reductase subunit PaaK [Paraburkholderiatelluris]      | 72.099     | 362              | 0         | 99          |
| A9762_27195                                               | AJC15727.1         | 4-hydroxyphenylacetate permease [Pandoraea sputorum]                               | 94.651     | 430              | 0         | 99          |
| <b>Phenylpropionic acid and cinnamic acid degradation</b> |                    |                                                                                    |            |                  |           |             |
| A9762_11010                                               | ALU88520.1         | Phenylpropionatedioxygenase.largeterminalsubunit[Variovoraxsp.HW608]               | 77.108     | 332              | 0         | 97          |

**Table S6.** Annotation of genes responsible for metabolism of central aromatic intermediates**Catechol branch of beta-ketoadipate pathway**

| Pando_Id (query) | Locus tag | NR_Db_Id (Subject) | Description                                                                   | % Identity | Alignment length | E-value   | Query cover |
|------------------|-----------|--------------------|-------------------------------------------------------------------------------|------------|------------------|-----------|-------------|
| A9762_19835      |           | EPX97674.1         | Catechol 1,2-dioxygenase (EC 1.13.11.1)                                       | 79.273     | 275              | 4.23E-160 | 94          |
| A9762_05645      |           | BAM71411.1         | hydroxyquinol 1,2-dioxygenase [Ralstoniapickettii]                            | 72.263     | 274              | 4.7E-144  | 94          |
| A9762_13825      |           | KAK75849.1         | mandelateracemase/muconatelactonizing enzyme [Bordetellabronchiseptica MO211] | 84.677     | 372              | 0         | 99          |
| A9762_14800      |           | AHB74276.1         | 3-oxoadipate enol-lactone hydrolase [Pandoraepnomenusa]                       | 90.975     | 277              | 0         | 95          |
| A9762_17465      |           | AJP59451.1         | 3-oxoadipate enol-lactonase [Pandoraevervacti]                                | 91.373     | 255              | 1.08E-168 | 97          |
| A9762_20400      |           | AJC18736.1         | Beta-ketoadipateenol-lactone hydrolase (EC 3.1.1.24)                          | 86.296     | 270              | 1.18E-155 | 94          |
| A9762_21335      |           | CFB62067.1         | Putative aminoacrylate hydrolase RutD [Pandoraepapista]                       | 85.833     | 240              | 6.85E-132 | 97          |
| A9762_00945      |           | SAL68494.1         | 3-oxoacid CoA-transferase subunit A [Paraburkholderiatelluris]                | 88.288     | 222              | 1.13E-140 | 98          |
| A9762_26655      |           | SCB24496.1         | 3-oxoacid CoA-transferase subunit A [Cupriavidusalkaliphilus]                 | 87.446     | 231              | 1.69E-147 | 99          |
| A9762_22015      |           | ALS60105.1         | Succinyl-CoA:3-ketoacid-coenzyme A transferase subunit A (EC 2.8.3.5)         | 83.267     | 251              | 2.22E-142 | 95          |
| A9762_00950      |           | SCB31929.1         | 3-oxoadipate CoA-transferase beta subunit [Cupriavidusalkaliphilus]           | 84.211     | 209              | 2.42E-128 | 97          |
| A9762_26660      |           | SAL73718.1         | 3-oxoacid CoA-transferase subunit B [Paraburkholderiachoica]                  | 89.151     | 212              | 1.94E-133 | 99          |

## Salicylate and gentisate catabolism

| Pando_Id (query)Locus tag | NR_Db_Id (Subject) | Description                                                            | % Identity | Alignment length | E-value   | Query cover |
|---------------------------|--------------------|------------------------------------------------------------------------|------------|------------------|-----------|-------------|
| A9762_00930               | ODV40846.1         | FAD-dependent oxidoreductase [Cupriavidus sp. UYMMa02A]                | 77.601     | 567              | 0         | 98          |
| A9762_01340               | SCB18330.1         | gentisate 1,2-dioxygenase [Cupriavidusalkaliphilus]                    | 84.77      | 348              | 0         | 99          |
| A9762_01355               | SCB18315.1         | 3-hydroxybenzoate 6-hydroxylase [Cupriavidusalkaliphilus]              | 83.733     | 375              | 0         | 92          |
| A9762_05250               | AOL06528.1         | 6-hydroxynicotinate 3-monooxygenase [Burkholderialata]                 | 84.555     | 382              | 0         | 98          |
| A9762_27205               | WP_044453514.1     | monooxygenase [Pandoraevervacti]                                       | 88         | 504              | 0         | 99          |
| A9762_10935               | ODS76726.1         | salicylate hydroxylase [Bordetella sp. SCN 67-23]                      | 75.346     | 361              | 0         | 94          |
| A9762_17480               | AKQ44180.1         | 4-hydroxybenzoate transporter [Cupriavidus sp. ST-14]                  | 68.224     | 428              | 0         | 93          |
| A9762_19875               | SAK47250.1         | major facilitator transporter [Burkholderiaarationis]                  | 52.381     | 462              | 5.64E-161 | 99          |
| A9762_01360               | SCB18308.1         | 4-hydroxybenzoate transporter [Cupriavidusalkaliphilus]                | 76.906     | 446              | 0         | 99          |
| A9762_01395               | AJC15953.1         | 4-hydroxybenzoate transporter                                          | 92.601     | 446              | 0         | 99          |
| A9762_05365               | AHB77010.1         | MFS transporter [Pandoraepnomenusa]                                    | 90.95      | 442              | 0         | 97          |
| A9762_06695               | AJC22813.1         | 4-hydroxybenzoate transporter [Pandoraepulmonicola]                    | 95.122     | 451              | 0         | 99          |
| A9762_01350               | ODV43763.1         | maleylacetoacetateisomerase [Cupriavidus sp. UYMMa02A]                 | 74.648     | 213              | 1.87E-117 | 99          |
| A9762_03985               | AKM33115.2         | Maleylacetoacetateisomerase (EC 5.2.1.2)                               | 81.86      | 215              | 7.24E-126 | 99          |
| A9762_05255               | WP_039397187.1     | Asp/Glucamase [Pandoraesputorum]                                       | 97         | 243              | 5.00E-176 | 100         |
| A9762_02055               | AHB76272.1         | maleylacetoacetateisomerase [Pandoraepnomenusa]                        | 89.623     | 212              | 7.34E-142 | 98          |
| A9762_01345               | ODV43764.1         | 5-carboxymethyl-2-hydroxyuconate isomerase [Cupriavidus sp.]           | 84.483     | 232              | 1.8E-144  | 99          |
| A9762_21820               | SCB17386.1         | fumarylacetoacetate hydrolase [Cupriavidusalkaliphilus]                | 73.934     | 422              | 0         | 99          |
| A9762_14650               | CDO29336.1         | 2-hydroxyhepta-2,4-diene-1,7-dioate isomerase [Mycobacterium vulneris] | 72.174     | 230              | 3.71E-119 | 98          |
| A9762_19175               | CFB64090.1         | Ureidoglycolatelyase [Pandoraesapista]                                 | 89.274     | 317              | 0         | 99          |
| A9762_23215               | EHP44713.1         | fumarylacetoacetate (FAA) hydrolase [Cupriavidusbasilensis OR16]       | 63.137     | 255              | 1.79E-117 | 99          |
| A9762_27350               | SAL20802.1         | fumarylacetoacetate (FAA) hydrolase [Paraburkholderiatelluris]         | 82.927     | 328              | 0         | 99          |

## Protocatechuate branch of beta-ketoadipate pathway

| Pando_Id (query) | Locus tag | NR_Db_Id (Subject) | Description                                                                         | % Identity | Alignment length | E-value   | Query cover |
|------------------|-----------|--------------------|-------------------------------------------------------------------------------------|------------|------------------|-----------|-------------|
| A9762_00940      |           | AJC18662.1         | IclR family transcriptional regulator [Pandoraesputorum]                            | 97.276     | 257              | 8.39E-180 | 94          |
| A9762_17445      |           | OED18908.1         | protocatechuate 3,4-dioxygenase subunit beta [Burkholderia sp. A2]                  | 74.569     | 232              | 2.71E-126 | 98          |
| A9762_17450      |           | WP_046291001.1     | protocatechuate 3,4-dioxygenase subunit alpha [Pandoraeaxalativorans]               | 89         | 178              | 2.00E-130 | 100         |
| A9762_17455      |           | AHB76694.1         | 3-carboxy-cis,cis-muconate cycloisomerase [Pandoraepnomenusa]                       | 84.464     | 457              | 0         | 99          |
| A9762_14775      |           | ODT36810.1         | 4-carboxymuconolactone decarboxylase [Lautropia sp. SCN 70-15]                      | 80.833     | 120              | 1.42E-68  | 96          |
| A9762_17460      |           | CAQ89147.1         | 4-carboxymuconolactone decarboxylase (CMD) [Escherichia fergusonii ATCC 35469]      | 68.75      | 128              | 2.55E-61  | 88          |
| A9762_14800      |           | AHB74276.1         | 3-oxoadipate enol-lactone hydrolase [Pandoraepnomenusa]                             | 90.975     | 277              | 0         | 95          |
| A9762_17465      |           | AJP59451.1         | 3-oxoadipate enol-lactonase [Pandoraevavacti]                                       | 91.373     | 255              | 1.08E-168 | 97          |
| A9762_20400      |           | AJC18736.1         | Beta-ketoadipateenol-lactone hydrolase (EC 3.1.1.24)                                | 86.296     | 270              | 1.18E-155 | 94          |
| A9762_21335      |           | CFB62067.1         | Putative aminoacrylate hydrolase RutD [Pandoraepapista]                             | 85.833     | 240              | 6.85E-132 | 97          |
| A9762_22015      |           | ALS60105.1         | Beta-ketoadipateenol-lactone hydrolase (EC 3.1.1.24)                                | 83.267     | 251              | 2.22E-142 | 95          |
| A9762_00945      |           | SAL68494.1         | 3-oxoacid CoA-transferase subunit A [Paraburkholderiatelluris]                      | 88.288     | 222              | 1.13E-140 | 98          |
| A9762_00950      |           | SCB31929.1         | 3-oxoadipate CoA-transferase beta subunit [Cupriavidusalkaliphilus]                 | 84.211     | 209              | 2.42E-128 | 97          |
| A9762_00955      |           | SCB31925.1         | acetyl-CoA C-acetyltransferase/acetyl-CoA acyltransferase [Cupriavidusalkaliphilus] | 85.75      | 400              | 0         | 99          |
| A9762_23730      |           | SCB31925.1         | acetyl-CoA C-acetyltransferase/acetyl-CoA acyltransferase [Cupriavidusalkaliphilus] | 86         | 400              | 0         | 99          |
| A9762_26655      |           | SCB24496.1         | 3-oxoacid CoA-transferase subunit A [Cupriavidusalkaliphilus]                       | 87.446     | 231              | 1.69E-147 | 99          |
| A9762_26660      |           | SAL73718.1         | 3-oxoacid CoA-transferase subunit B [Paraburkholderiachoica]                        | 89.151     | 212              | 1.94E-133 | 99          |
| A9762_01305      |           | AJC23270.1         | alpha-ketoglutaratepermease [Pandoraepulmonicola]                                   | 93.24      | 429              | 0         | 98          |
| A9762_10400      |           | AJC18570.1         | MFS transporter / dicarboxylic acid transporter [Pandoraesputorum]                  | 97.375     | 419              | 0         | 99          |

## N-heterocyclic aromatic compound degradation

| Pando_Id (query)Locus tag | NR_Db_Id (Subject) | Description                                                             | % Identity | Alignment length | E-value  | Query cover |
|---------------------------|--------------------|-------------------------------------------------------------------------|------------|------------------|----------|-------------|
| A9762_12915               | CFB61120.1         | Isoquinoline 1-oxidoreductase subunit beta [Pandoraeaapista]            | 87.834     | 748              | 0        | 99          |
| A9762_05275               | WP_046292552.1     | aldehyde dehydrogenase [Pandoraeaoxalativorans]                         | 92         | 698              | 0        | 98          |
| A9762_00300               | AHB76506.1         | Isoquinoline 1-oxidoreductase beta subunit (EC 1.3.99.16)               | 90.43      | 721              | 0        | 97          |
| A9762_12910               | AEF88978.1         | Isoquinoline 1-oxidoreductase [Delftia sp. Cs1-4]                       | 73.469     | 147              | 3.13E-75 | 99          |
| A9762_05245               | KPD19386.1         | (2Fe-2S)-binding protein [Burkholderia sp. ST111]                       | 80.488     | 164              | 6.22E-91 | 98          |
| A9762_00295               | WP_047908730.1     | PLP-dependent aminotransferase family protein [Pandoraefaecigallinarum] | 94         | 376              | 0        | 100         |

## Central meta-cleavage pathway of aromatic compound degradation

| Pando_Id (query)Locus tag | NR_Db_Id (Subject) | Description                                                                | % Identity | Alignment length | E-value   | Query cover |
|---------------------------|--------------------|----------------------------------------------------------------------------|------------|------------------|-----------|-------------|
| A9762_21285               | ODS69252.1         | Protocatechuate 4,5-dioxygenase alpha chain (EC 1.13.11.8)                 | 71.429     | 119              | 5.36E-57  | 99          |
| A9762_21280               | EGD14970.1         | protocatechuate 4,5-dioxygenase beta subunit [Xanthomonasperforans 91-118] | 82.394     | 284              | 4.95E-175 | 99          |
| A9762_24855               | ODS79332.1         | 3,4-dihydroxyphenylacetate 2,3-dioxygenase (EC 1.13.11.15)                 | 72.222     | 288              | 2.28E-159 | 99          |
| A9762_24850               | ODS79333.1         | 5-carboxymethyl-2-hydroxyruconate semialdehyde dehydrogenase (EC 1.2.1.60) | 76.375     | 491              | 0         | 99          |
| A9762_25270               | AJP58375.1         | 2-hydroxy-6-oxo-6-phenylhexa-2,4-dienoate hydrolase (EC 3.7.1.-)           | 86.88      | 363              | 0         | 97          |
| A9762_04685               | WP_046292026.1     | 4-oxalocrotonate tautomerase [Pandoraeaoxalativorans]                      | 93         | 65               | 2.00E-39  | 98          |
| A9762_24840               | ODS79336.1         | 2-oxo-hepta-3-ene-1,7-dioic acid hydratase [Acidovorax sp. SCN 65-28]      | 71.429     | 266              | 1.65E-139 | 99          |
| A9762_04965               | CFB59979.1         | Acetaldehyde dehydrogenase [Pandoraeaapista]                               | 98.408     | 314              | 0         | 99          |

## Homogentisate pathway of aromatic compound degradation

| Pando_Id (query) | Locus tag | NR_Db_Id (Subject) | Description                                                              | % Identity | Alignment length | E-value   | Query cover |
|------------------|-----------|--------------------|--------------------------------------------------------------------------|------------|------------------|-----------|-------------|
| A9762_21815      |           | SAL80458.1         | homogentisate 1,2-dioxygenase [Paraburkholderiatelluris]                 | 82.944     | 428              | 0         | 97          |
| A9762_00970      |           | ODV41070.1         | 4-hydroxyphenylpyruvate dioxygenase [Cupriavidus sp. UYMMa02A]           | 91.317     | 357              | 0         | 99          |
| A9762_01350      |           | ODV43763.1         | maleylacetoacetateisomerase [Cupriavidus sp. UYMMa02A]                   | 74.648     | 213              | 1.87E-117 | 99          |
| A9762_01310      |           | KGW48977.1         | merR regulatory family protein [Burkholderiapseudomallei MSHR684]        | 56.418     | 335              | 1.31E-127 | 97          |
| A9762_02055      |           | AHB76272.1         | maleylacetoacetateisomerase [Pandoraepapilionum]                         | 89.623     | 212              | 7.34E-142 | 98          |
| A9762_01345      |           | ODV43764.1         | 5-carboxymethyl-2-hydroxyruconate isomerase [Cupriavidus sp. UYMMa02A]   | 84.483     | 232              | 1.8E-144  | 99          |
| A9762_21820      |           | SCB17386.1         | fumarylacetoacetate hydrolase [Cupriavidusalkaliphilus]                  | 73.934     | 422              | 0         | 99          |
| A9762_02750      |           | SAL81482.1         | aromatic amino acid aminotransferase [Paraburkholderiachoica]            | 78.697     | 399              | 0         | 99          |
| A9762_02865      |           | SAL18442.1         | class I/II aminotransferase [Burkholderiaperedens]                       | 69.531     | 384              | 0         | 97          |
| A9762_00980      |           | SAK78909.1         | aromatic amino acid aminotransferase [Burkholderiaptereochothonis]       | 81.108     | 397              | 0         | 99          |
| A9762_17555      |           | SAL18442.1         | class I/II aminotransferase [Burkholderiaperedens]                       | 56.186     | 388              | 2.2E-160  | 95          |
| A9762_01455      |           | ODV41069.1         | aromatic amino acid aminotransferase [Cupriavidus sp. UYMMa02A]          | 74.747     | 396              | 0         | 99          |
| A9762_24875      |           | SAL50293.1         | IcIR family transcriptional regulator [Paraburkholderiaudeis]            | 80.992     | 242              | 3.32E-140 | 96          |
| A9762_14885      |           | CFB62532.1         | Acetate operon repressor [Pandoraepapista]                               | 97.71      | 262              | 0         | 99          |
| A9762_00805      |           | SAL80324.1         | IcIR family transcriptional regulator [Paraburkholderiatelluris]         | 68.539     | 267              | 1.59E-125 | 92          |
| A9762_00810      |           | SCB09651.1         | transcriptional regulator, IcIR family [Cupriavidusalkaliphilus]         | 70.238     | 252              | 3.65E-122 | 99          |
| A9762_03330      |           | AHB76430.1         | IcIR family transcriptional regulator [Pandoraepapilionum]               | 85.502     | 269              | 7.89E-152 | 95          |
| A9762_00915      |           | SAL87254.1         | IcIR family transcriptional regulator [Paraburkholderiachoica]           | 81.102     | 254              | 1.05E-150 | 99          |
| A9762_17580      |           | AKM32377.2         | Transcriptional regulator, IcIR family                                   | 98.77      | 244              | 4.71E-174 | 99          |
| A9762_19060      |           | AHB76961.1         | transcriptional regulator [Pandoraepapilionum]                           | 90.476     | 252              | 4.31E-167 | 86          |
| A9762_19985      |           | AHB74593.1         | IcIR family transcriptional regulator [Pandoraepapilionum]               | 95.455     | 264              | 0         | 99          |
| A9762_20365      |           | CFB60313.1         | HTH-type transcriptional regulator KipR [Pandoraepapista]                | 98.79      | 248              | 2.94E-178 | 99          |
| A9762_20415      |           | AHB74544.1         | IcIR family transcriptional regulator [Pandoraepapilionum]               | 98.387     | 248              | 9.38E-179 | 99          |
| A9762_22920      |           | EON11650.1         | IcIR family transcriptional regulator [Pandoraepapista]                  | 97.942     | 243              | 2.96E-174 | 99          |
| A9762_23015      |           | ALL68065.1         | transcriptional regulator, IcIR family [Paraburkholderiacaribensis MBA4] | 63.035     | 257              | 1.41E-108 | 95          |
| A9762_23460      |           | OAK61863.1         | IcIR family transcriptional regulator [Variovoraxparadoxus]              | 43.154     | 241              | 1.14E-65  | 89          |
| A9762_05760      |           | KPD16152.1         | IcIR family transcriptional regulator [Burkholderia sp. ST111]           | 83.86      | 285              | 3.26E-170 | 96          |
| A9762_25085      |           | EON13327.1         | IcIR family transcriptional regulator [Pandoraepapista]                  | 93.309     | 269              | 1.87E-177 | 99          |
| A9762_06720      |           | WP_039395317.1     | IcIR family transcriptional regulator [Pandoraepapista]                  | 99         | 258              | 0         | 100         |
| A9762_02330      |           | WP_047906735.1     | IcIR family transcriptional regulator [Pandoraepapista]                  | 89         | 269              | 0         | 100         |
| A9762_27355      |           | CFB62943.1         | Transcriptional regulator, IcIR family                                   | 85.56      | 277              | 3.57E-152 | 94          |
| A9762_10930      |           | AJP59478.1         | IcIR family transcriptional regulator [Pandoraepapista]                  | 94.792     | 288              | 0         | 99          |
| A9762_10970      |           | AJP59478.1         | IcIR family transcriptional regulator [Pandoraepapista]                  | 94.792     | 288              | 0         | 99          |

**Table S7.** Annotation of genes related to Glutathione metabolism and stress response

| Pando_Id (query) | NR_Db_Id (Subject) | Description                                                                              | % identity | alignment length | evalue    | qcovs |
|------------------|--------------------|------------------------------------------------------------------------------------------|------------|------------------|-----------|-------|
| A9762_23385      | OED18901.1         | glutathione ABC transporter permeaseGsiD [Burkholderia sp. A2]                           | 88.298     | 282              | 0         | 99    |
| A9762_17400      | AHB76675.1         | glutathione ABC transporter permeaseGsiD [Pandoraepnomenusa]                             | 95.035     | 282              | 0         | 98    |
| A9762_26475      | AHB74970.1         | glutathione peroxidase [Pandoraepnomenusa]                                               | 90.446     | 157              | 1.7E-104  | 93    |
| A9762_15125      | OED18129.1         | glutathione S-transferase [Burkholderia sp. A2]                                          | 71.429     | 203              | 1.57E-103 | 94    |
| A9762_25920      | OED12452.1         | glutathione S-transferase [Burkholderia sp. A2]                                          | 68.095     | 210              | 2.7E-101  | 97    |
| A9762_18915      | KPD19945.1         | glutathione S-transferase [Burkholderia sp. ST111]                                       | 77.13      | 223              | 1.8E-125  | 99    |
| A9762_25290      | ODV42245.1         | glutathione S-transferase [Cupriavidus sp. UYMMa02A]                                     | 63.362     | 232              | 5.47E-103 | 97    |
| A9762_17280      | AJC18614.1         | glutathione S-transferase [Pandoraesputorum]                                             | 86.916     | 214              | 2.72E-125 | 95    |
| A9762_09395      | SAL44491.1         | glutathione S-transferase [Paraburkholderiatelluris]                                     | 55.399     | 213              | 2.37E-84  | 97    |
| A9762_21360      | KLN47139.1         | glutathione S-transferase [Providenciarettgeri]                                          | 35.644     | 202              | 2.3E-39   | 92    |
| A9762_00695      | AIL61297.1         | glutathione S-transferase [Pseudomonas alkylphenolia]                                    | 62.201     | 209              | 3.06E-86  | 99    |
| A9762_01420      | EJL96406.1         | glutathione S-transferase [Pseudomonas sp. GM102]                                        | 61.194     | 201              | 1.33E-83  | 90    |
| A9762_25435      | OAK61673.1         | glutathione S-transferase [Variovoraxparadoxus]                                          | 58.824     | 204              | 1.73E-79  | 99    |
| A9762_27060      | AIO26625.1         | glutathione S-transferase 2 [Burkholderiacepacia ATCC 25416]                             | 74.528     | 212              | 2.24E-115 | 92    |
| A9762_02245      | SAL21216.1         | glutathione synthetase [Paraburkholderiatelluris]                                        | 75         | 316              | 4.09E-169 | 99    |
| A9762_17125      | KUK27111.1         | Glutathione transport system permease protein GsiC [Acetothermia bacterium 64_32]        | 50.336     | 298              | 1.08E-96  | 95    |
| A9762_17115      | CDZ54459.1         | Glutathione-binding protein GsiB [Neorhizobiumgalegaebv. orientalis]                     | 56.89      | 508              | 0         | 95    |
| A9762_15295      | EPJ93917.1         | glutathione-dependent formaldehyde-activating GFA [Pseudomonas sp. CF149]                | 56.154     | 130              | 6.78E-49  | 98    |
| A9762_14280      | ALK32265.1         | glutathione-dependent formaldehyde-activating protein [Burkholderiaplantarii]            | 48.507     | 134              | 2.82E-44  | 98    |
| A9762_06655      | EIM72377.1         | glutathione-dependent formaldehyde-activating protein [Nitratireductoraquibiodomus RA22] | 55.856     | 111              | 1.05E-40  | 93    |
| A9762_24585      | ANY77517.1         | glutathione-disulfidereductase [Microvirga sp. V5/3M]                                    | 64.143     | 449              | 0         | 99    |
| A9762_19965      | CEJ12736.1         | Glutathione-regulated potassium-efflux system ancillary protein Keff [bacterium YEK0313] | 65.5       | 200              | 2.42E-91  | 98    |
| A9762_08325      | AHB05231.2         | hydroxyacylglutathione hydrolase [Pandoraepnomenusa 3kgm]                                | 88.462     | 260              | 9.54E-167 | 94    |
| A9762_04000      | KPD20186.1         | lactoylglutathionelyase [Burkholderia sp. ST111]                                         | 70.161     | 124              | 3.06E-58  | 99    |
| A9762_12990      | CFB61104.1         | Lactoylglutathionelyase [Pandoraepnomenusa]                                              | 93.985     | 133              | 1.45E-89  | 99    |

**Superoxide Dismutase**

| Pando_Id (query) | NR_Db_Id (Subject) | Description                                                 | % identity | alignment length | evalue    | qcovs |
|------------------|--------------------|-------------------------------------------------------------|------------|------------------|-----------|-------|
| A9762_16420      | KYP12368.1         | superoxide dismutase [Limnobacter sp. CACIAM 66H1]          | 83.246     | 191              | 1.23E-120 | 99    |
| A9762_20590      | ODT64140.1         | superoxide dismutase [Nitrosomonadales bacterium SCN 54-20] | 55.959     | 193              | 3.81E-71  | 97    |
| A9762_05205      | WP_038617481.1     | Superoxide dismutase SodM-like protein ChrF                 | 88         | 218              | 5.00E-19  | 100   |

**Glutaredoxin**

| Pando_Id (query) | NR_Db_Id (Subject) | Description                             | % identity | alignment length | evalue   | qcovs |
|------------------|--------------------|-----------------------------------------|------------|------------------|----------|-------|
| A9762_21380      | SAK82439.1         | Glutaredoxin [Burkholderiacatudaia]     | 38.672     | 256              | 4.31E-54 | 99    |
| A9762_18155      | SAL29912.1         | glutaredoxin 2 [Burkholderiaperedens]   | 56.579     | 76               | 1.35E-22 | 93    |
| A9762_02205      | SAL83115.1         | glutaredoxin 3 [Paraburkholderiachoica] | 80.233     | 86               | 1.27E-46 | 99    |

**Thioredoxin**

| Pando_Id (query) | NR_Db_Id (Subject) | Description                                                              | % identity | alignment length | evalue    | qcovs |
|------------------|--------------------|--------------------------------------------------------------------------|------------|------------------|-----------|-------|
| A9762_10565      | EON13999.1         | Putative thioredoxin [Pandoraea sp. SD6-2]                               | 91.406     | 128              | 8.87E-79  | 98    |
| A9762_02295      | SAL26452.1         | Thiol-disulfideisomerase/thioredoxin-like protein [Burkholderiaperedens] | 70.414     | 169              | 3.46E-83  | 96    |
| A9762_09775      | GAQ30519.1         | thioredoxin [Ralstonia sp. NT80]                                         | 89.815     | 108              | 2.08E-66  | 99    |
| A9762_21390      | SAK58934.1         | thioredoxinreductase [Burkholderiaptereochothonis]                       | 72.24      | 317              | 6.13E-174 | 99    |
| A9762_14295      | OED12953.1         | thioredoxinreductase [Burkholderia sp. A2]                               | 69.435     | 301              | 2.32E-147 | 99    |
| A9762_19935      | ABO53901.1         | thioredoxinreductase [Burkholderiavietnamiensis G4]                      | 82.595     | 316              | 0         | 99    |
| A9762_21500      | CFB64917.1         | Thioredoxin-1 [Pandoraeapista]                                           | 90.106     | 283              | 0         | 99    |
| A9762_12750      | CAJ94244.1         | Thioredoxin-like protein [Ralstoniaeutropha H16]                         | 53.125     | 160              | 3.11E-56  | 91    |

**Catalase**

| Pando_Id (query) | NR_Db_Id (Subject) | Description                       | % identity | alignment length | evalue    | qcovs |
|------------------|--------------------|-----------------------------------|------------|------------------|-----------|-------|
| A9762_14510      | KPD18059.1         | catalase [Burkholderia sp. ST111] | 66.022     | 362              | 7.98E-175 | 99    |



|             |            |                                            |        |     |           |    |
|-------------|------------|--------------------------------------------|--------|-----|-----------|----|
| A9762_15065 | SCB07688.1 | catalase [Cupriavidusalkaliphilus]         | 76.744 | 473 | 0         | 98 |
| A9762_01165 | AKB40108.1 | Catalase [Methanosarcinamazei S-6]         | 59.468 | 301 | 1.76E-127 | 89 |
| A9762_05565 | ADE10952.1 | Catalase [Sideroxydanslithotrophicus ES-1] | 56.452 | 310 | 1.24E-126 | 86 |
| A9762_19890 | KUO98787.1 | catalase [Stenotrophomonasmaltophilia]     | 92.139 | 547 | 0         | 99 |
| A9762_17205 | ODU43538.1 | catalase [Thiobacillus sp. SCN 63-374]     | 84.034 | 476 | 0         | 97 |

---

**Table S8.** Represents secondary metabolite clusters identified in *Pandoraea* sp. ISTKB genome.

| Clusters  | Secondary metabolites        | Contig number     | Position |        |
|-----------|------------------------------|-------------------|----------|--------|
|           |                              |                   | Start    | End    |
| Cluster 1 | Terpene                      | NZ_MAOS01000023.1 | 43156    | 64031  |
| Cluster 2 | Nonribosomal peptides (Nrps) | NZ_MAOS01000028.1 | 266130   | 354115 |
| Cluster 3 | Thailanstatin/ Mangotoxin    | NZ_MAOS01000031.1 | 42017    | 85616  |
| Cluster 4 | Arylpolyene                  | NZ_MAOS01000044.1 | 14082    | 59545  |
| Cluster 5 | Homoserine lactone           | NZ_MAOS01000045.1 | 39255    | 60139  |
| Cluster 6 | Phosphonate-Terpene          | NZ_MAOS01000050.1 | 6780     | 70269  |
| Cluster 7 | Bacteriocin                  | NZ_MAOS01000052.1 | 8006     | 18836  |
| Cluster 8 | Homoserine lactone           | NZ_MAOS01000061.1 | 19488    | 40315  |
| Cluster 9 | Lasso peptide                | NZ_MAOS01000083.1 | 160463   | 183061 |
